# Supplementary material for: The Effect of Recipient Back-Table Duration on Graft Outcome of Deceased Donor Kidneys: A Single-Center Prospective Cohort Study
Source: J Clin Med. 2023 Apr 2;12(7):2647. doi: 10.3390/jcm12072647 (PMC10094751; doi:10.3390/jcm12072647)
Supplement: Supplementary file 1 [file jcm-12-02647-s001.zip › jcm-2134815-SI.pdf]

**Table S1;** Temperature course during back-table preparation. SCS = static cold storage

| Time               | Temperature Mean | Standard deviation |
|--------------------|------------------|--------------------|
| Temperature SCS    | 3.4              | 2.1                |
| Temperature 5 min  | 5.5              | 2.2                |
| Temperature 10 min | 6.7              | 2.4                |
| Temperature 15 min | 7.8              | 2.4                |
| Temperature 20 min | 8.2              | 2.6                |
| Temperature 25 min | 8.3              | 3.0                |
| Temperature 30 min | 8.3              | 2.2                |
| Temperature 40 min | 8.6              | 3.2                |
| Temperature 50 min | 10.0             | 2.9                |
| Temperature 60 min | 14.9             | 2.8                |

**Table S2;** Temperature course during implantation. SCS = static cold storage.

| Time                               | Temperature Mean | Standard deviation |
|------------------------------------|------------------|--------------------|
| Temperature SCS                    | 4.5              | 2.9                |
| Temperature 5 min                  | 20.7             | 3.4                |
| Temperature 10 min                 | 23.7             | 3.1                |
| Temperature 15 min                 | 24.3             | 3.4                |
| Temperature 20 min                 | 25.0             | 2.8                |
| Temperature 25 min                 | 25.1             | 2.1                |
| Temperature 30 min                 | 25.9             | 2.4                |
| Temperature 5 min post-reperfusion | 32.6             | 2.3                |

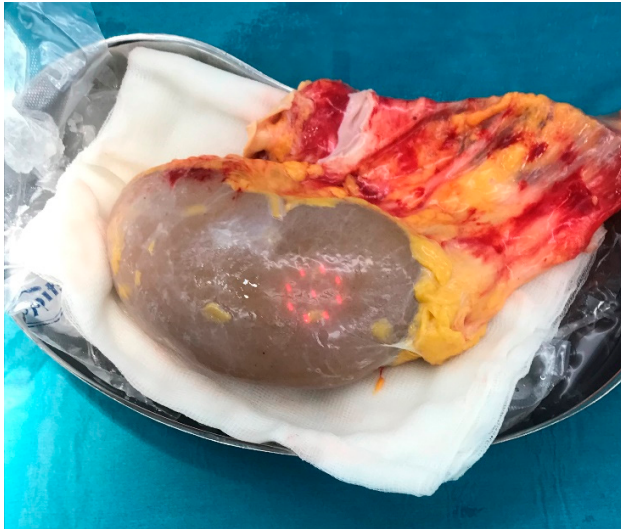

**Figure S1:** Laserbeam of thermometer on kidney surface.

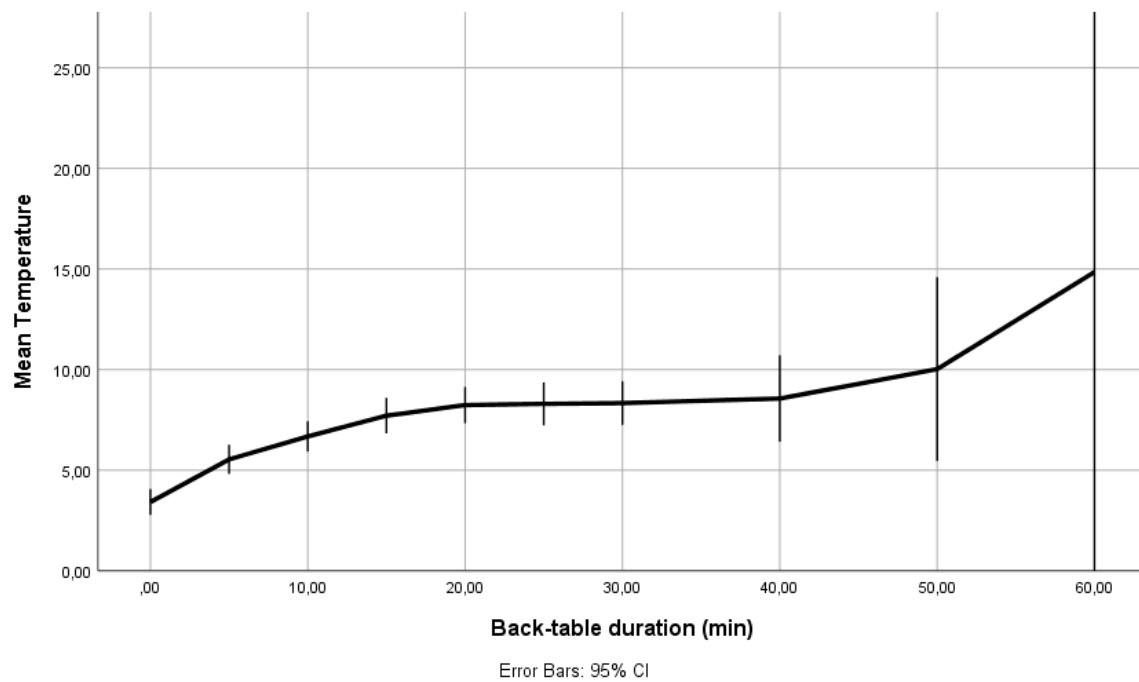

**Figure S2;** Temperature course during back-table preparation.

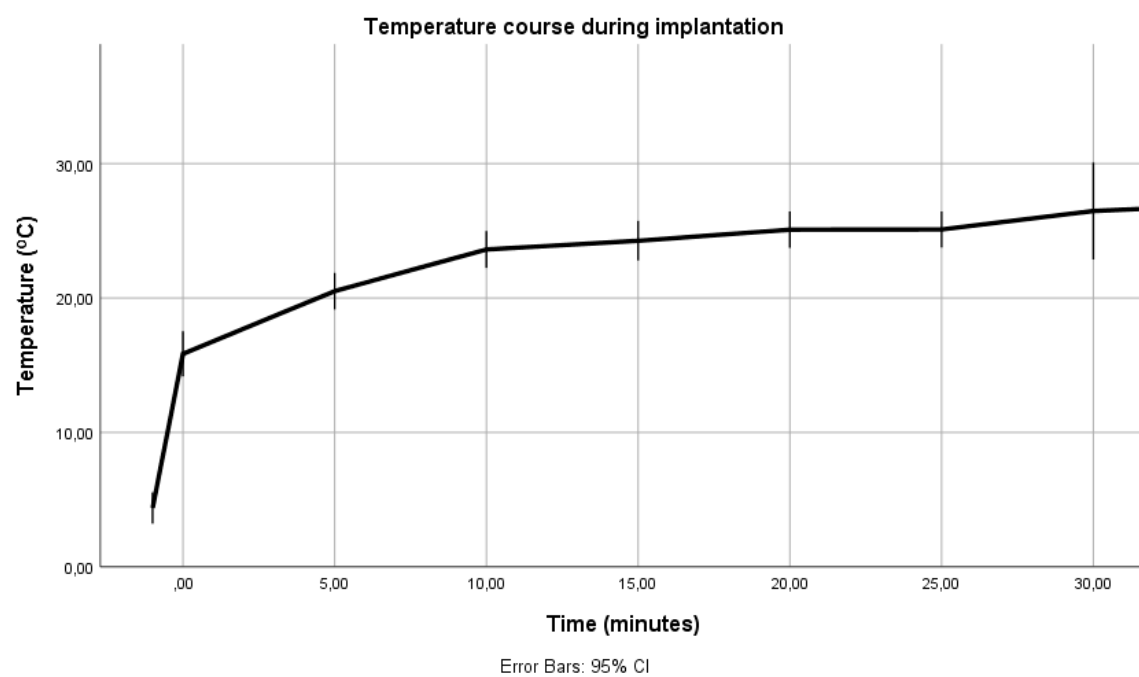

**Figure S3;** Temperature course during implantation.

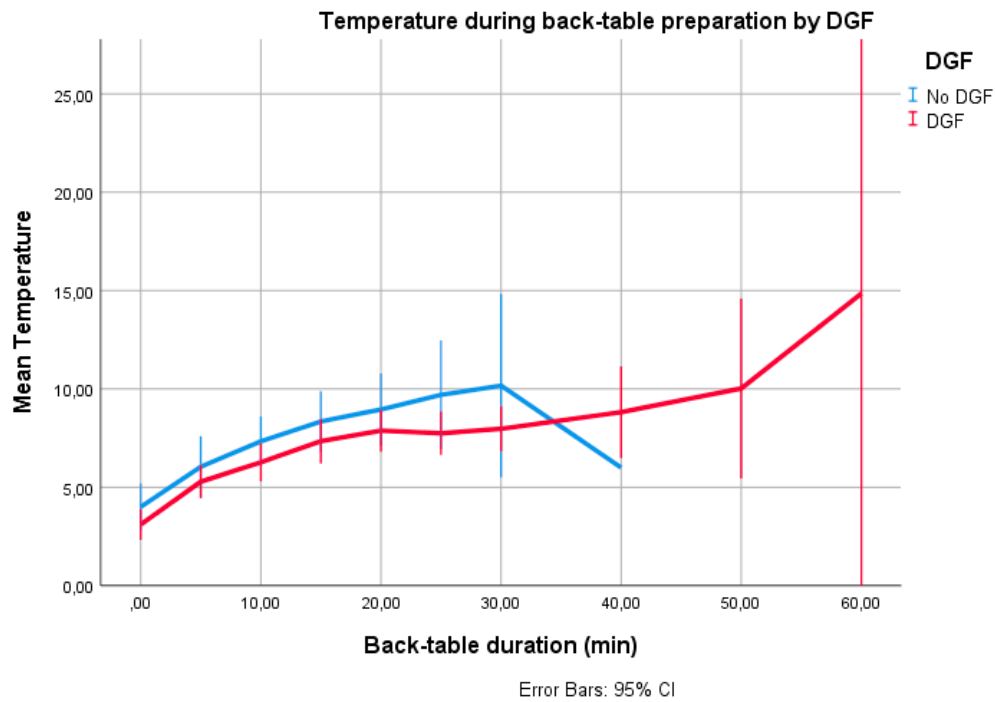

**Figure S4;** Temperature course during back-table preparation of kidneys with and without DGF.

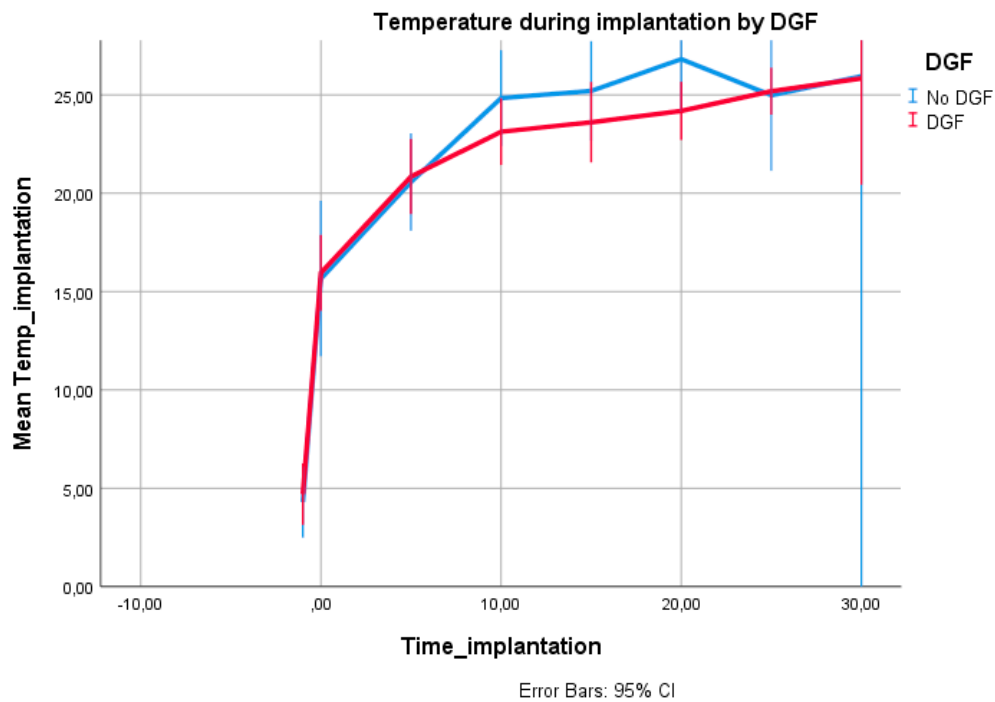

**Figure S5;** Temperature course during implantation of kidneys with and without DGF.
